## Maximal growth rate requires minimal metabolic complexity

Daan H. de Groot<sup>1</sup>, Robert Planqué<sup>2</sup>, Coco van Boxtel<sup>1</sup>, Frank J. Bruggeman<sup>1</sup> and Bas Teusink<sup>1</sup>

<sup>1</sup>Systems Bioinformatics, Vrije Universiteit, Amsterdam, The Netherlands

<sup>2</sup>Mathematics, Vrije Universiteit, Amsterdam, The Netherlands

E-mail: d.h.de.groot@vu.nl, r.planque@vu.nl, c.van.boxtel@vu.nl, f.j.bruggeman@vu.nl, b.teusink@vu.nl

**The rate at which a microorganism produces offspring (specific growth rate) is a near universal selective pressure across microbial species. Growth requires metabolic enzymes, whose properties and expressions are moulded by evolution, within the bounds set by physical and chemical constraints. We asked therefore, if basic (bio)chemistry can determine the outcome of evolution. We found an evolutionary extremum principle that dictates that specific growth rate maximisation requires minimisation of metabolic complexity. This principle is a mathematical consequence of maximising specific growth rate under mass-conservation and protein-concentration constraints. We prove that the number of growth-limiting constraints bounds the number of active metabolic subnetworks (defined by Elementary Flux Modes) at maximal growth rate. Therefore, the complexity of metabolic behaviour is determined by the number of active protein constraints, not the size of the network. The consequences of the fundamental principle can be visualised in a graphical framework that provides a unified understanding of metabolic behaviours conserved across microbial species<sup>1</sup>, such as diauxic growth<sup>2</sup>, mixed substrate usage<sup>3</sup> and overflow metabolism<sup>4</sup>. This work therefore provides a biochemical basis for the fundamental limits of evolution, and the driving forces of evolutionary change under growth-enabling conditions.**

Fitter microorganisms drive competitors to extinction by synthesising more viable offspring in time<sup>5,6</sup>. The rate of offspring-cell synthesis per cell, i.e., specific growth rate, is a common selective pressure across microbial species<sup>5</sup>. High growth rate requires high metabolic rates, which in turn requires high enzyme concentrations<sup>7</sup>. Due to limited biosynthetic resources, such as ribosomes, polymerases, energy and nutrients, the expression of any enzyme is at the expense of others<sup>8,9</sup>. Consequently, proper balancing of enzyme benefits and costs results in optimally-tuned enzyme expression that maximises growth rate<sup>10-12</sup>.

We asked whether the evolutionary endpoint of this

optimisation can be predicted from general principles of metabolism, i.e., from (i) mass conservation: steady-state reaction-stoichiometry relations, and (ii) enzyme biochemistry: the proportionality of an enzyme's activity to its concentration. Such an endpoint can indeed be found, in the form of an evolutionary extremum principle: growth-rate maximisation drives microorganisms to minimal metabolic complexity. We provide the mathematical proof of this principle in the supplemental information. Minimal metabolic complexity can be unambiguously defined in terms of 'Elementary Flux Modes' (EFM). An EFM is a mathematical definition of a metabolic subnetwork at steady state: it is a minimal set of thermodynamically feasible reactions that form a network from external sources to sinks<sup>13</sup>. An EFM is elementary (or minimal, non-decomposable) because none of its reactions can be removed without halting flux. An EFM is purely defined in terms of reaction stoichiometry; enzyme kinetics are not required, and are known to maximise specific flux<sup>14,15</sup>. Suppose that pure respiratory growth and fermentative growth are each EFMs, then respiro-fermentative growth is not, as it can be decomposed. In general, any flux distribution can be decomposed into positive linear combinations of EFMs<sup>13</sup>.

A cell requires around 250 reactions to make all its cellular components from basic nutrients<sup>16</sup>. This size is indeed comparable with the size of a calculated EFM sufficient for cell synthesis<sup>17</sup>. Because of the many combinations of parallel, alternative metabolic routes in metabolic networks, the total number of such EFMs in one such network is in the hundreds of millions; the exact number depends on the network and the growth-medium conditions<sup>17</sup>. However, when we estimate, from experimental data (SI 8), the number of EFMs that cells actually use at a particular condition, then this number is small, in the order of 1 to 3. That microorganisms choose only a handful of EFMs out of millions of alternatives suggests that these alternatives are not evolutionarily equivalent, and only a small number has been selected. This can be explained by the extremum principle, which in terms of EFMs states: when the rate of a particular metabolic reaction in a metabolic network is maximised, the number of flux-carrying EFMs is at most equal to the number of

active constraints on protein concentrations. We define the constraints as sums of selected (weighted) protein concentrations. A constraint is ‘active’ when it limits the cell in increasing its growth rate, indicating that the corresponding protein pool is fully used. The principle also applies to the cell-synthesis reaction, which makes all cellular components in the right proportions according to the biomass composition, and is hence also known as the biomass reaction<sup>18</sup>. The extremum principle demands that if the number of constraints is low, so is the number of active EFMs at optimal growth rate.

We focus on protein constraints because the properties and expression of proteins are the major biological variables that evolution acts on. In addition, recent work indicates that many aspects of microbial growth can be understood from a protein allocation perspective.<sup>8,9,19–22</sup> Moreover, other studied constraints such as the solvent capacity of cellular compartments<sup>23</sup> or cellular membranes<sup>24</sup> or of the entire cell<sup>20</sup> can be reformulated in terms of constrained protein pools, e.g. a limited cytosolic protein pool or a limited membrane protein pool (SI 3). The exact nature of these pools could vary per organism and environmental condition, but the effects described by the extremum principle will not.

Constraints on protein concentrations limit the cell synthesis rate. Thus, the EFM, or the combination of EFMs, that uses the smallest fractions of the constrained protein pools for reaching one unit of specific growth rate is optimal. A graphical representation of the optimisation problem in ‘constraint space’ illustrates this in an intuitive manner (Figure 1). In the case of multiple constrained protein pools, different EFMs vary in their usage of such pools, making the cost of implementing an EFM a multidimensional variable. Each EFM is therefore assigned a ‘cost vector’ in constraint space: a cost vector quantifies, for each constrained protein pool, the fraction that an EFM requires for producing one unit of objective flux - here the cell synthesis flux. The direction of a cost vector thus denotes which pool is used most by this EFM. Specific growth rate maximisation now becomes a geometric problem in constraint space: fit the largest possible multiple of cost vectors within the constraint space. Shorter vectors, corresponding to EFMs with lower enzymatic costs, will fit more often and will produce a higher flux.

This is illustrated for a 2-constraint problem in Figure 1: both constraints can be fully used with only two vectors (EFMs). However, an EFM that sits on the diagonal can make full use of both constrained protein

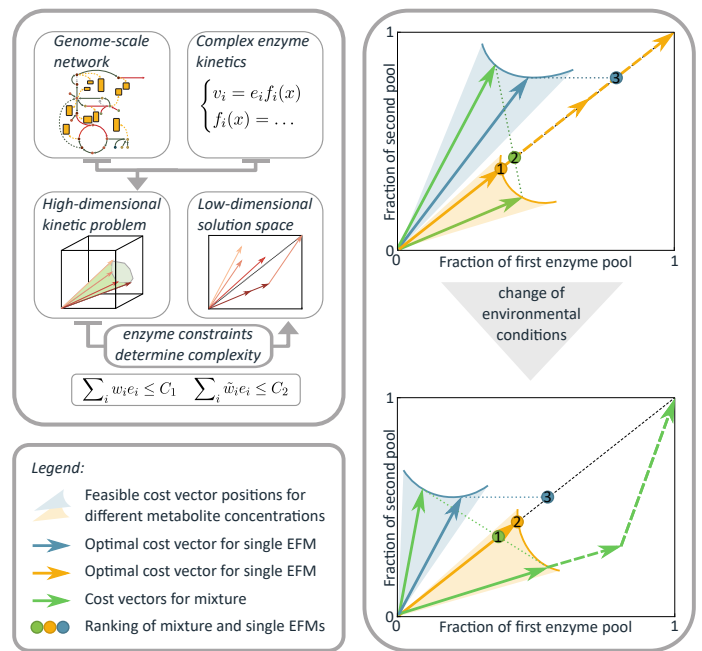

**Figure 1: Illustration of the EFM cost vector**

**formalism. Left panel:** The extremum principle states that the dimensionality of the solution space is determined by the number of protein-concentration constraints, rather than by the dimensionality of the metabolic network. The constraints result from fundamental limits, e.g. a limited solvent capacity. **Right panel:** The *cost vector*  $\mathbf{d}^i = [d_1^i, d_2^i]^T$  of the  $i^{\text{th}}$  EFM denotes the fractions of the first and second protein pool that this EFM needs to produce one unit objective flux. The usage of a certain combination of EFMs  $i$  and  $j$  corresponds to a weighted sum of the cost vectors:  $\lambda_i \mathbf{d}^i + \lambda_j \mathbf{d}^j$ . The combination is possible as long as none of the constraints is exceeded:  $\lambda_i \mathbf{d}^i + \lambda_j \mathbf{d}^j \leq \mathbf{1}$ . The optimal objective flux is achieved by maximising the sum of weights ( $\lambda_i + \lambda_j$ ). This optimal sum is shown by the dashed vectors. The sole use of an off-diagonal cost vector leads to underuse of one constraint, while diagonal cost vectors can exhaust both constrained pools. A mixture of EFMs will always be a combination of an above-diagonal and a below-diagonal vector. All EFMs and combinations thereof, can be ranked by a dot on the diagonal which denotes the average cost per unit cell synthesis flux. Above-diagonal cost vectors should be projected horizontally, below-diagonal vectors vertically, and for combinations we should follow the connecting line. The (mixture of) EFM(s) with the lowest average cost reaches the highest growth rate (see Lemma 4 in the SI for details). The shaded regions indicate alternative positions for the cost vectors under different intracellular metabolite concentrations. We have drawn two of these alternative concentrations for two EFMs. The blue and orange cost vectors are calculated at those concentrations that would lead to the highest growth rate when using only that EFM. The green vectors are vectors that would lead to a mixture of the orange and blue EFM. Upon a change of environmental conditions, the mixture of EFMs becomes better than either single EFM. This would lead to a qualitative change in metabolic behaviour. Although the shown cost vectors reflect only few choices of metabolite concentrations, our mathematical results are valid for all possible concentrations.

pools: hence, the extremum principle is that the number of EFMs that maximise flux is equal to *or less* than the number of active constraints. We have derived the necessary and sufficient conditions under which it is optimal to use EFMs in combinations (SI). Note that the length and direction of the cost vector can depend on the metabolite concentrations. We study the consequences in the SI.

The extremum principle is independent of the complexity of the metabolic network, i.e., of its kinetics and its structure. Rather, the metabolic complexity is determined by the number of active constraints; the kinetics and structure will subsequently determine which EFMs will be optimal and selected by evolution - as illustrated by *in silico* evolution of metabolic regulation towards only one active EFM<sup>25</sup>. The fact that constraints determine metabolic complexity is the important insight that our work produces. Genome-scale metabolic models, which contain all the annotated metabolic reactions that a microorganism's genome encodes<sup>26</sup>, will therefore behave qualitatively similar to simplified models, and coarse-grained models can be used without loss of generality. This greatly facilitates our understanding of metabolic behavior as a consequence of the extremum principle.

Several widely-occurring metabolic behaviours can be understood through the extremum principle. A well-known recurrent behaviour is overflow metabolism: It refers to the apparently wasteful excretion of metabolic products. Examples are the aerobic production of ethanol by yeasts (Crabtree effect), lactate by cancer cells (Warburg) or acetate by *Escherichia coli*<sup>8,27,28</sup>. The onset of overflow metabolism is generally studied as a function of growth rate (e.g., in chemostats). When the growth rate is increased above some critical value, respiratory flux decreases and the flux of overflow metabolism emerges. Below this critical growth rate, the respiratory flux is proportional to the growth rate (see Figure 2), which is one of the distinctive characteristics of the usage of a single EFM (see SI 8.1). Moreover, the continuously decreasing respiratory flux and increasing overflow flux indicate that two EFMs must be active and resources are re-allocated from respiration to fermentation proteins. Thus, according to our theory, at least two constraints must be active.

For illustration purposes, we constructed a core model of overflow metabolism that includes enzyme kinetics for each step, a respiration and acetate overflow branch, and imposed constraints on two protein pools: total cytosolic protein, and total membrane protein. Figure 2 shows that overflow metabolism can be the outcome of the cell's strategy to maximise

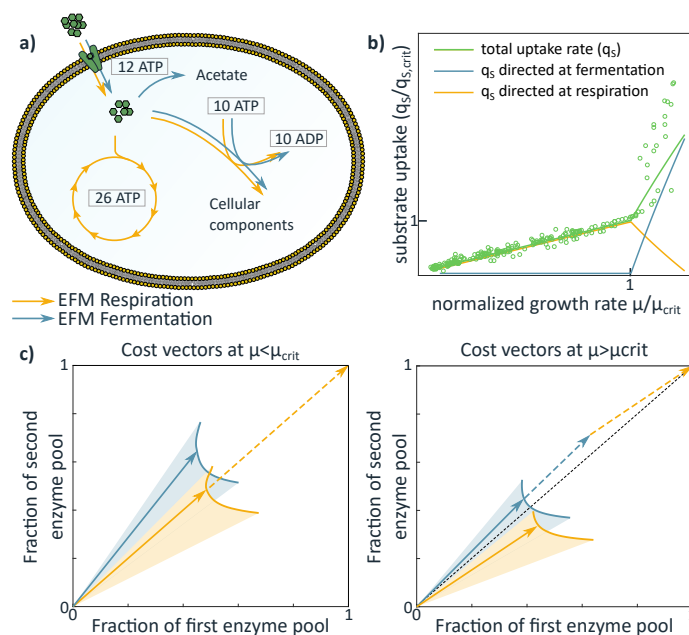

**Figure 2: Overflow metabolism can be explained by growth rate maximisation under protein-concentration constraints.** **a)** A core model with two EFMs (orange: respiration and blue: acetate overflow) that lead to cell synthesis. All considered reactions have an associated enzyme, whose activity depends on kinetic parameters and the metabolite concentrations. We varied growth rate by changing the external substrate concentration. Given this external condition, the growth rate was optimised under two enzymatic constraints (limited total enzyme  $\sum e_i \leq 1$  and limited membrane area  $e_{\text{transport}} \leq 0.3$ ). **b)** The resulting substrate uptake flux directed towards respiration and fermentation is in agreement with experimental data scaled with respect to the growth rate ( $\mu_{\text{crit}}$ ) and uptake rate ( $q_{\text{crit}}$ ) at the onset of overflow<sup>8,27,28</sup> (see SI 8). **c)** The cost vectors (solid arrows) of the two EFMs before (left) and after (right) the respirofermentative switch. The position of the cost vectors are shown for the optimised metabolite concentrations; the shaded regions show alternative positions of the cost vectors at different enzyme and metabolite concentrations. The dashed vectors show the usage of the EFMs in the optimal solution.

its growth rate under these two protein-concentration constraints. At low glucose concentrations, the constrained membrane pool limits substrate uptake and therefore favours efficient use of glucose via respiration. In this respiratory phase, the cytosolic pool could be considered in excess, but in the model the expression of extra cytosolic proteins can nonetheless reduce product inhibition of the transporter pools. Consequently, for a large range of external substrate concentrations pure respiration leads to the highest growth rate by fully exploiting the two available enzyme pools. As glucose concentrations increase, so does the saturation level of the enzymes, as observed experimentally<sup>29,30</sup>.

At higher glucose concentrations, however, transport requires relatively less protein and the respiration cost vector becomes below-diagonal: pure respiration will



leave membrane protein pool underused; the cytosolic pool limits respiration. A better strategy is to respire less and make some of the cytosolic pool available for another EFM that can exploit the underused membrane pool. The net outcome is that a mixture of EFMs attains a higher growth rate than either of the two EFMs alone. This explains the onset of overflow metabolism, from a basic principle: optimisation of growth rate under a set of constrained protein pools.

Explanations for overflow metabolism offered by other modelling methods, such as coarse-grained whole cell models<sup>8,9,21</sup>, genome-scale M<sup>23,31-33</sup> and ME models<sup>34</sup>, are discussed in the supplemental information. There we show that mathematically all of them are instances of the same constrained optimisation problem and thus follow the extremum principle.

The constraint plane formalism can predict how experimental perturbations influence overflow metabolism. These perturbations can often be re-interpreted as either reducing a constrained protein pool or increasing the resource requirement of an EFM. In both cases, this can be visualized by a reduction of the size of the constraint box. Experimental data from a perturbation experiment can be used to deduce which protein pools were affected in the perturbation. This mechanistic insight informs us about the origins of overflow metabolism, as is illustrated in Figure 3a-d where we predict the effect of the reduction of both pools or only the first ( $x$ -axis) constrained pool (see SI 6 for a mathematical analysis).

Overexpression of the unneeded protein LacZ **3e** seems to reduce both enzyme pools equally. To find the most straightforward explanation, recall that the cost vectors denote the needed fraction of the constrained protein pools for one unit cell synthesis flux. The synthesis of LacZ requires a part of both pools that cannot be invested in useful proteins. Since LacZ can be considered an average protein in terms of resource requirements, and metabolism was already tuned to make proteins, the reduced parts of both pools will be equal.

The addition of chloramphenicol inhibits translation and the cell therefore needs a larger amount of ribosomes per unit flux. This again adds a cost for cell synthesis, thereby reducing both pools. The experiment however shows that chloramphenicol has a more dominant effect on the first pool ( $x$ -axis) than on the second pool (Figure 3f). This means that the increased number of ribosomes has an additional effect on this first pool, which could well be related to the large cytosolic volume that the ribosomes take in.

The co-consumption of substrates is another universal phenomenon that can be analysed with our

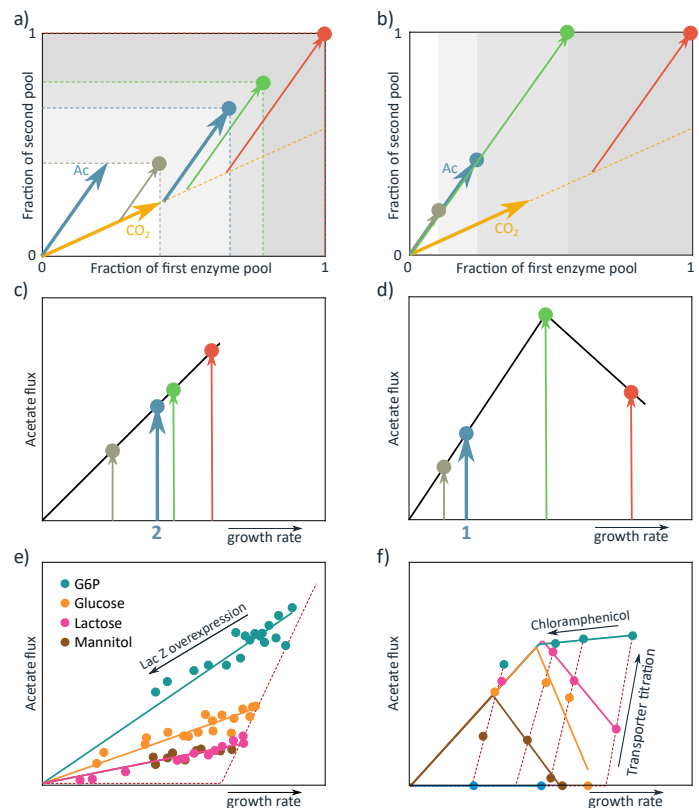

**Figure 3: Perturbation experiments that affect the sizes of the constrained protein pools affect the optimal flux distribution and maximal growth rate in specific patterns visible in the titration experiments from Basan et al.<sup>8</sup> a,c) A constraint plane analysis of perturbations that tighten both protein pools with the same factor will result in proportionality of flux and growth rate, as observed experimentally (e) for the overexpression of LacZ under different carbon sources (data from Basan et al.<sup>8</sup>). b,d) We predict that perturbations that tighten the protein pool most used by one EFM (here denoted by  $CO_2$ ) first lead to an increase in flux through the other EFM (Ac), and a subsequent decrease as its flux also becomes constrained by the perturbation. f) This behaviour is observed, a.o., for translation inhibitor experiments using chloramphenicol (SI 7).**

EFM-based perspective. A comparison of the costs for mixed and single substrate usage determines whether a growth-optimised micro-organism shows catabolite repression or not. In *E. coli*, transport-mediated mixed substrate usage was observed in medium containing combinations of excess carbon sources<sup>35</sup>. Combinations of substrates that enter upstream of glycolysis with substrates that enter downstream often gave rise to a higher growth rate than can be reached on the substrates individually. Hermsen et al. showed that growth rates on these combinations can be accurately predicted with a core model. We performed a genome-scale EFM-analysis (SI 10) and found Elementary Flux Modes that use combinations of an upper- and a lower-glycolytic substrate. However, we also found EFMs that combine two upper-glycolytic substrates, indicat-

ing that co-consumption of two of these substrates could be optimal. We therefore confirmed and extended the growth experiments from Hermsen and indeed found co-consumption of all combinations of mannose, maltose, xylose and succinate (SI 11).

In Figure 4 we analyse our experimental results, by estimating the position of the cost vectors from the experimental data. The positions of these vectors determine whether xylose is not consumed (+glucose), co-consumed without a measurable growth rate advantage (+maltose) or co-consumed with a growth rate advantage (+succinate). Combining these vector positions with the metabolic network allows for a new perspective: the differences between cost vectors can only be caused by the non-overlapping parts of the EFMs, since the enzymatic costs in the overlapping parts are equal. Thus, larger gains in growth rate can be expected if the network distance between the substrates is larger.

This analysis can also be applied to co-consumption of glucose and ethanol by *S. cerevisiae*. Its metabolic network includes several EFMs that simultaneously take up glucose and ethanol. When external glucose levels decrease, the costs of the glycolytic reactions increase, making it increasingly favorable to stop these reactions and use a new EFM that co-consumes glucose and ethanol, but makes a larger part of the cell components from ethanol. The experimental finding<sup>3</sup> of a sequential use of several EFMs, can therefore be readily explained using the constraint space, see SI 9.2.

The extremum principle that we derived and illustrated in this work, predicts that evolution of metabolic regulation proceeds by fixation of mutations that influence enzyme kinetics to increase the rate per unit enzyme – i.e., evolution shortens cost vectors of EFMs. Resources are reallocated to those ‘efficient’ enzymes at the expense of others that are less active per unit enzyme – i.e., evolution reduces the number of active EFMs. This shows a fundamental limit in microbial evolution: under constant conditions, a metabolic state is selected that uses only a small number of EFMs, or even only one, that use the available resources from all constrained enzyme pools.

The extremum principle determines the evolutionary direction of microbial metabolism. Even if growth-rate maximisation at constant conditions is at best a crude approximation of the selective pressure at particular instances of evolutionary history, we expect that it nonetheless provides an ‘evolutionary arrow of time’ over long time scales. When conditions change frequently, other aspects might come into play and fitness will be captured by the mean growth rate over environments, i.e., the geometric growth rate<sup>5</sup>. Whether

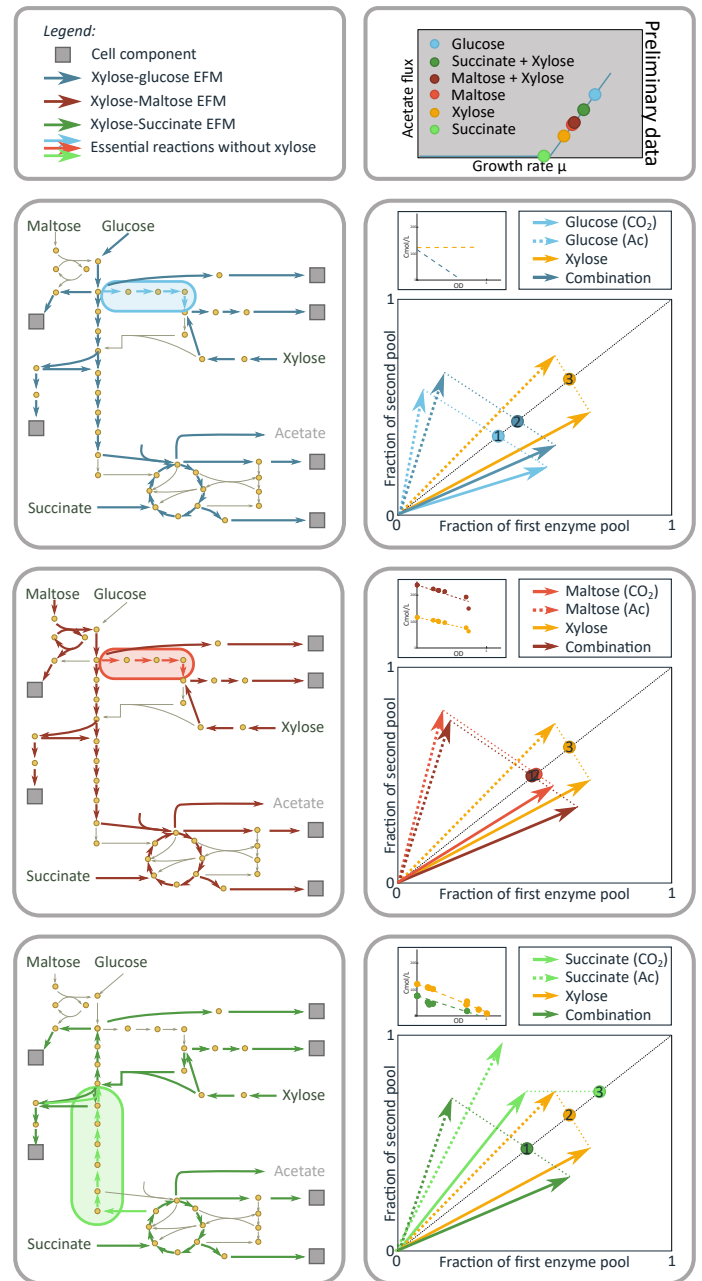

**Figure 4: The (dis)advantage of co-consuming xylose in terms of cost vectors.** **Left:** We show, in an illustration of the metabolic network of *E. coli*, EFMs that co-consume xylose with another carbon source. The reactions in the shaded regions can be switched off when xylose is co-consumed, but are otherwise essential. The enzymatic costs for these reactions can thus be traded off for the costs of xylose uptake. This will change the cost vector positions and determine whether co-consumption increases the growth rate. **Right:** The positions of the cost vectors can be estimated from our experimental data: the growth rate determines the place of the projection on the diagonal (big dots), and acetate excretion determines the relative angles with the diagonal of the respiration and fermentation cost vector.

extremum principles hold for the maximisation of geometric growth rate is an open problem for future theoretical work.

The extremum principle is a null hypothesis about the course of a particular evolutionary process<sup>36</sup>. This has direct operational implications for evolutionary engineering strategies, for example in industrial biotechnology where co-consumption of different sugars from biomass-hydrolysates are pursued, or prevention of overflow metabolism during heterologous protein production is attempted. Our extremum principle provides a species-overarching molecular, constraint-based perspective on the systemic capabilities of biological networks and their contributions to microbial fitness. We hope that it provides explanatory and predictive power like other extremum principles in science have done, such as the second law of thermodynamics.

## Acknowledgements

We thank Sieze Douwenga, Willi Gottstein, Dennis Botman, Johan van Heerden, and Rinke van Tatenhove-Pel for comments, questions and proofreading.

## References

1. Chubukov, V., Gerosa, L., Kochanowski, K. & Sauer, U. Coordination of microbial metabolism. *Nat. Rev. Microbiol.* **12**, 327–340 (2014). [arXiv:1011.1669v3](https://arxiv.org/abs/1011.1669v3).
2. Görke, B. & Stülke, J. Carbon catabolite repression in bacteria: many ways to make the most out of nutrients. *Nat. Rev. Microbiol.* **6**, 613–24 (2008).
3. De Jong-Gubbels, P., Vanrolleghem, P., Heijnen, S., Van Dijken, J. P. & Pronk, J. T. Regulation of carbon metabolism in chemostat cultures of *Saccharomyces cerevisiae* grown on mixtures of glucose and ethanol. *Yeast* **11**, 407–418 (1995).
4. Vemuri, G. N., Altman, E., Sangurdekar, D. P., Khodursky, A. B. & Eiteman, M. A. Overflow metabolism in *Escherichia coli* during steady-state growth : transcriptional regulation and effect of the redox ratio. *Appl. Environ. Microbiol.* **72**, 3653–3661 (2006).
5. Sæther, B.-E. & Engen, S. The concept of fitness in fluctuating environments. *Trends Ecol. & Evol.* **30**, 273–281 (2015).
6. Kussell, E. & Leibler, S. Phenotypic diversity, population growth, and information in fluctuating environments. *Science (80-. )*. **309**, 2075–2078 (2005).
7. Cornish-Bowden, A. *Principles of enzyme kinetics* (Elsevier, 2014).
8. Basan, M. *et al.* Overflow metabolism in *Escherichia coli* results from efficient proteome allocation. *Nature* **528**, 99–104 (2015).
9. Molenaar, D., van Berlo, R., de Ridder, D. & Teusink, B. Shifts in growth strategies reflect tradeoffs in cellular economics. *Mol. Syst. Biol.* **5**, 323 (2009). [1512.00567](https://arxiv.org/abs/1512.00567).
10. Alon, U., Surette, M. G., Barkai, N. & Leibler, S. Robustness in bacterial chemotaxis. *Nature* **397**, 168–171 (1999).
11. Berkhout, J. *et al.* How biochemical constraints of cellular growth shape evolutionary adaptations in metabolism. *Genetics* **194**, 505 LP – 512 (2013).
12. Keren, L. *et al.* Massively parallel interrogation of the effects of gene expression levels on fitness. *Cell* **166**, 1282–1294 (2016).
13. Schuster, S., Fell, D. A. & Dandekar, T. A general definition of metabolic pathways useful for systematic organization and analysis of complex metabolic networks. *Nat. Biotechnol.* **18**, 326–332 (2000).
14. Wortel, M. T., Peters, H., Hulshof, J., Teusink, B. & Bruggeman, F. J. Metabolic states with maximal specific rate carry flux through an elementary flux mode. *FEBS J.* **281**, 1547–1555 (2014).
15. Müller, S., Regensburger, G. & Steuer, R. Enzyme allocation problems in kinetic metabolic networks: Optimal solutions are elementary flux modes. *J. Theor. Biol.* **347**, 182–190 (2014). [arXiv:1308.0510v1](https://arxiv.org/abs/1308.0510v1).
16. Koonin, E. V. How many genes can make a cell: The minimal-gene-Set concept 1. *Annu. Rev. Genomics Hum. Genet.* **1**, 99–116 (2000).
17. Maarleveld, T. R., Wortel, M. T., Olivier, B. G., Teusink, B. & Bruggeman, F. J. Interplay between Constraints, Objectives, and Optimality for Genome-Scale Stoichiometric Models. *PLoS Comput. Biol.* **11**, 1–21 (2015).
18. Feist, A. M. & Palsson, B. O. The biomass objective function. *Curr. Opin. Microbiol.* **13**, 344–349 (2010).
19. Scott, M., Klumpp, S., Mateescu, E. M. & Hwa, T. Emergence of robust growth laws from optimal regulation of ribosome synthesis. *Mol. Syst. Biol.* **10**, 747 (2014).
20. Scott, M., Gunderson, C. W., Mateescu, E. M., Zhang, Z. & Hwa, T. Interdependence of cell growth and gene expression: origins and consequences. *Science (80-. )*. **330**, 1099–1102 (2010).
21. Weiße, A. Y., Oyarzún, D. A., Danos, V. & Swain, M. S. The evolution of gene expression noise. *PLoS Comput. Biol.* **11**, e1004111 (2015).

- P. S. Mechanistic links between cellular trade-offs, gene expression, and growth. *Proc. Natl. Acad. Sci.* **112**, E1038—E1047 (2015).
22. Hui, S. *et al.* Quantitative proteomic analysis reveals a simple strategy of global resource allocation in bacteria. *Mol. Syst. Biol.* **11**, 784 (2015).
23. Vazquez, A. & Oltvai, Z. N. Macromolecular crowding explains overflow metabolism in cells. *Sci. Rep.* **6**, 31007 (2016).
24. Zhuang, K., Vemuri, G. N. & Mahadevan, R. Economics of membrane occupancy and respiro-fermentation. *Mol. Syst. Biol.* **7**, 500 (2011).
25. Gottstein, W., Müller, S., Herzel, H. & Steuer, R. Elucidating the adaptation and temporal coordination of metabolic pathways using in-silico evolution. *BioSystems* **117**, 68–76 (2014).
26. Price, N. D., Reed, J. L. & Palsson, B. Ø. Genome-scale models of microbial cells: evaluating the consequences of constraints. *Nat. Rev. Microbiol.* **2**, 886–897 (2004).
27. van Hoek, P., Van Dijken, J. P. & Pronk, J. T. Effect of Specific Growth Rate on Fermentative Capacity of Baker 's Yeast. *Society* **64**, 4226–4233 (1998).
28. Peebo, K. *et al.* Proteome reallocation in *Escherichia coli* with increasing specific growth rate. *Mol. Biosyst.* **11**, 1184–1193 (2015).
29. Goel, A. *et al.* Protein costs do not explain evolution of metabolic strategies and regulation of ribosomal content: does protein investment explain an anaerobic bacterial Crabtree effect? *Mol. Microbiol.* **97**, 77–92 (2015).
30. Canelas, A. B., Ras, C., ten Pierick, A., van Gulik, W. M. & Heijnen, J. J. An in vivo data-driven framework for classification and quantification of enzyme kinetics and determination of apparent thermodynamic data. *Metab. Eng.* **13**, 294–306 (2011).
31. van Hoek, M. J. A. & Merks, R. M. H. Redox balance is key to explaining full vs. partial switching to low-yield metabolism. *BMC Syst. Biol.* **6**, 22 (2012).
32. Mori, M., Hwa, T., Martin, O. C., De Martino, A. & Marinari, E. Constrained allocation Flux Balance Analysis. *PLoS Comput. Biol.* **12**, 1–24 (2016). 1607.00128.
33. Nilsson, A. & Nielsen, J. Metabolic Trade-offs in Yeast are Caused by F1F0-ATP synthase. *Sci. Rep.* **6**, 22264 (2016).
34. O'Brien, E. J., Lerman, J. A., Chang, R. L., Hyde, D. R. & Palsson, B. O. Genome-scale models of metabolism and gene expression extend and refine growth phenotype prediction. *Mol. Syst. Biol.* **9**, 693–693 (2014).
35. Hermsen, R., Okano, H., You, C., Werner, N. & Hwa, T. A growth-rate composition formula for the growth of *E. coli* on co-utilized carbon substrates. *Mol. Syst. Biol.* **11**, 801 (2015).
36. Smith, J. M. Optimization theory in evolution. *Annu. Rev. Ecol. Syst.* **9**, 31–56 (1978).
37. Gagneur, J. & Klamt, S. Computation of elementary modes: a unifying framework and the new binary approach. *BMC bioinformatics* **5**, 175 (2004).
38. Gagneur, J. & Klamt, S. Computation of elementary modes: a unifying framework and the new binary approach. *BMC Bioinformatics* **5**, 175 (2004).
39. Planque, R., Hulshof, J., Teusink, B., Hendriks, J. & Bruggeman, F. J. Maintaining maximal metabolic flux by gene expression control. *bioRxiv* (2017).
40. von Stosch, M., Rodrigues de Azevedo, C., Luis, M., Feye de Azevedo, S. & Oliveira, R. A principal components method constrained by elementary flux modes: analysis of flux data sets. *BMC Bioinformatics* **17**, 200 (2016).
41. Fonseca, G. G., Gombert, A. K., Heinzle, E. & Wittmann, C. Physiology of the yeast *Kluyveromyces marxianus* during batch and chemostat cultures with glucose as the sole carbon source. *FEMS Yeast Res.* **7**, 422–435 (2007).
42. Holms, H. Flux analysis and control of the central metabolic pathways in *Escherichia coli*. *FEMS Microbiol. Rev.* **19**, 85–116 (1996).
43. Nanchen, A., Schicker, A. & Sauer, U. Nonlinear dependency of intracellular fluxes on growth rate in miniaturized continuous cultures of *Escherichia coli*. *Appl. Environ. Microbiol.* **72**, 1164–1172 (2006).
44. Postma, E., Verduyn, C., Scheffers, W. A. & Van Dijken, J. P. Enzymic analysis of the crabtree effect in glucose-limited chemostat cultures of *Saccharomyces cerevisiae*. *Appl. Environ. Microbiol.* **55**, 468–477 (1989).
45. Snoep, J. L., Mrwebi, M., Schuurmans, J. M., Rohwer, J. M. & Teixeira de Mattos, M. J. T. Control of specific growth rate in *Saccharomyces cerevisiae*. *Microbiology* **155**, 1699–1707 (2009).
46. Tännler, S., Decasper, S. & Sauer, U. Maintenance metabolism and carbon fluxes in *Bacillus* species. *Microb. Cell Fact.* **7**, 19 (2008).
47. Terzer, M. & Stelling, J. Large-scale computation of elementary flux modes with bit pattern trees. *Bioinformatics* **24**, 2229–2235 (2008).



48. Gutnick, D., Calvo, J. M., Klopotoski, T. & Ames, B. N. Compounds which serve as the sole source of carbon or nitrogen for *Salmonella typhimurium* LT-2. *J. Bacteriol.* **100**, 215–219 (1969).
49. Smith, R. F., Humphreys, S. & Hockaday, T. D. R. The measurement of plasma acetate by a manual or automated technique in diabetic and non-diabetic subjects. *Ann. Clin. Biochem.* **23**, 285–291 (1986).
